# Supplementary material for: CAF-Released Exosomal miR-20a-5p Facilitates HCC Progression via the LIMA1-Mediated β-Catenin Pathway
Source: MDPI journal article supplement (doi:10.3390/cells11233857), 2022-11-30
Supplement: s1 [file s1]

Supporting Information

# **CAF-released exosomal miR-20a-5p facilitates HCC progression via the LIMA1-mediated $\beta$ -catenin pathway**

Yong Qi<sup>1,2</sup>, Haibo Wang<sup>1,2</sup>, Qikun Zhang<sup>1,2</sup>, Zhiqiang Liu<sup>2</sup>, Tianbing Wang<sup>3</sup>, Zhengsheng Wu<sup>4</sup>\*, Wenyong Wu<sup>1,2,3</sup> \*

Table of contents:

Supplementary Figure S1

Supplementary Figure S2

Supplementary Figure S3

Supplementary Figure S4

Supplementary Figure S5

Supplementary Figure S6

Supplementary Figures and figure legends

Supplementary Figure S1

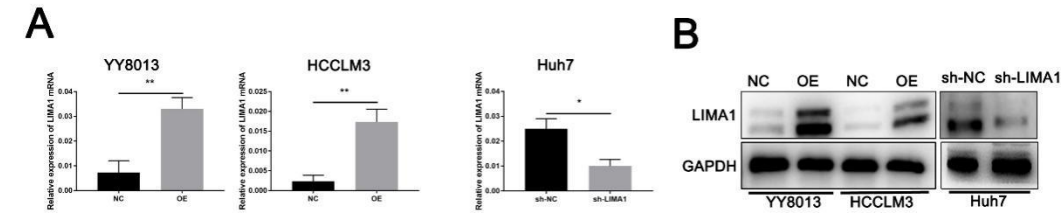

**Supplementary Figure S1.** LIMA1 was overexpressed or knocked down in HCC cell lines. LIMA1 overexpression in YY8103 and HCCLM3 cells and LIMA1 knockdown in Huh7 cells were determined by RT-qPCR (A), and western blotting (B). (NC, normal control; OE, LIMA1 overexpression). \* $P < 0.05$ , \*\* $P < 0.01$ , \*\*\* $P < 0.001$ .

Supplementary Figure S2

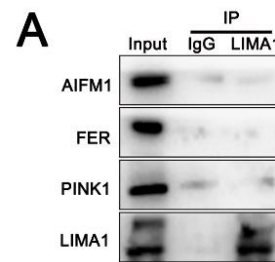

**Supplementary Figure S2.** LIMA1 could not bind to AIFM1, FER and PINK1. (A) IP assay was performed to detect the binding of LIMA1 to AIFM1, FER and PINK1.

Supplementary Figure S3

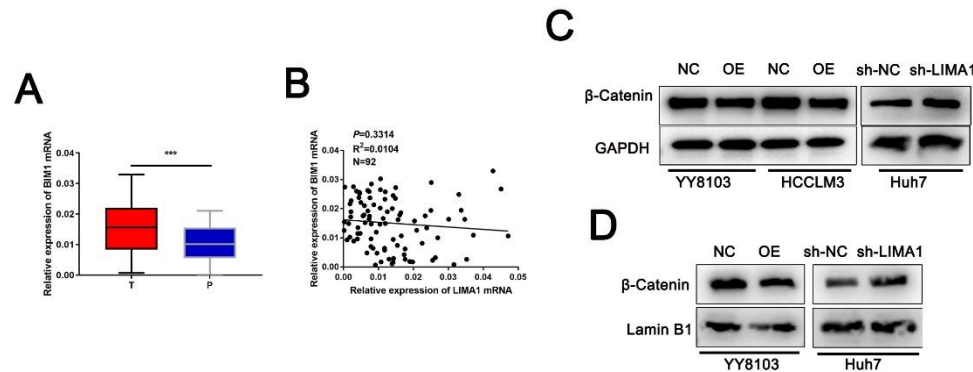

**Supplementary Figure S3.** BMI1 was upregulated in HCC and mediated the activation of wnt/ $\beta$ -catenin pathway. (A) The expression level of BMI1 mRNA and (B) the correlation of

LIMA1 and BMI1 were examined by qRT-PCR in ninety-two pairs of HCC patients. (C)  $\beta$ -catenin expression was detected with LIMA1 knockdown or overexpression. (D) Nuclear proteins were obtained to examine the  $\beta$ -catenin expression level with LIMA1 knockdown or overexpression. (NC, normal control; OE, LIMA1 overexpression). \* $P < 0.05$ , \*\* $P < 0.01$ , \*\*\* $P < 0.001$ .

**Supplementary Figure S4**

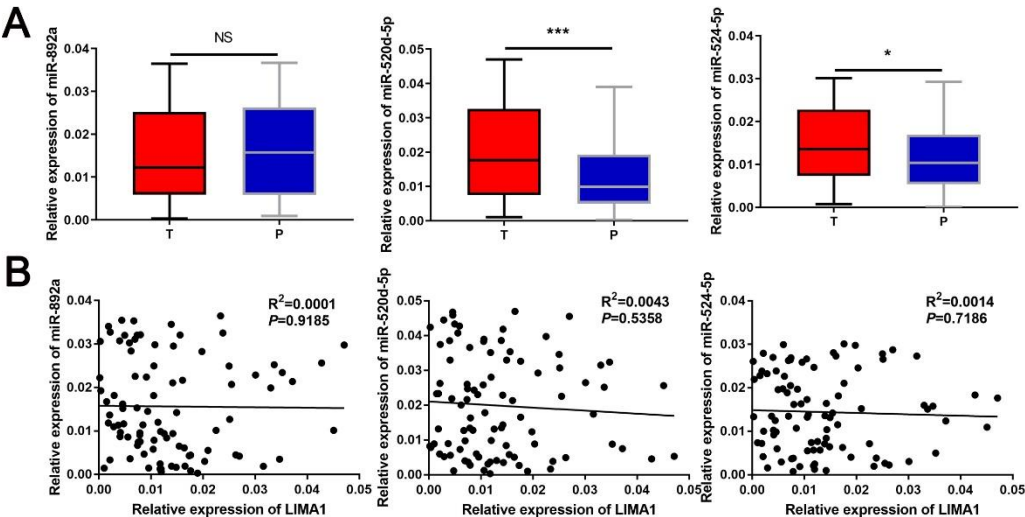

**Supplementary Figure S4.** Expression of miR-892a, miR-520d-5p and miR-524-5p and their correlation were analyzed in HCC tissues. (A) Expression of miR-892a, miR-520d-5p and miR-524-5p in HCC tissues was examined by RT-qPCR. (B) The correlation between miR-892a, miR-520d-5p, miR-524-5p and LIMA1 was analyzed in HCC tissues. NS:  $P > 0.05$ , \* $P < 0.05$ , \*\* $P < 0.01$ , \*\*\* $P < 0.001$ .

**Supplementary Figure S5**

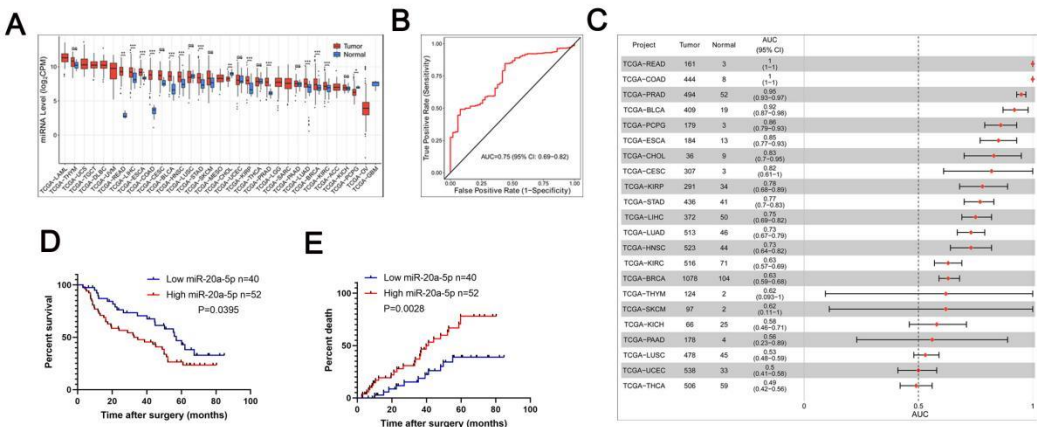

**Supplementary Figure S5.** Expression of miR-20a-5p in various cancers and its clinical significance were investigated based on TCGA database, and the survival curves of miR-20a-5p in the miR-20a-5p-high and miR-20a-5p-low groups. (A) The expression level of miR-20a-5p in multiple type of cancers was determined based on TCGA database. (B) and (C)

The AUC value of miR-20a-5p in HCC and many other cancers was determined based on TCGA database. (D) Overall survival (OS) and (E) recurrence-free survival (RFS) of HCC patients in the miR-20a-5p-high and miR-20a-5p-low groups.

**Supplementary Figure S6**

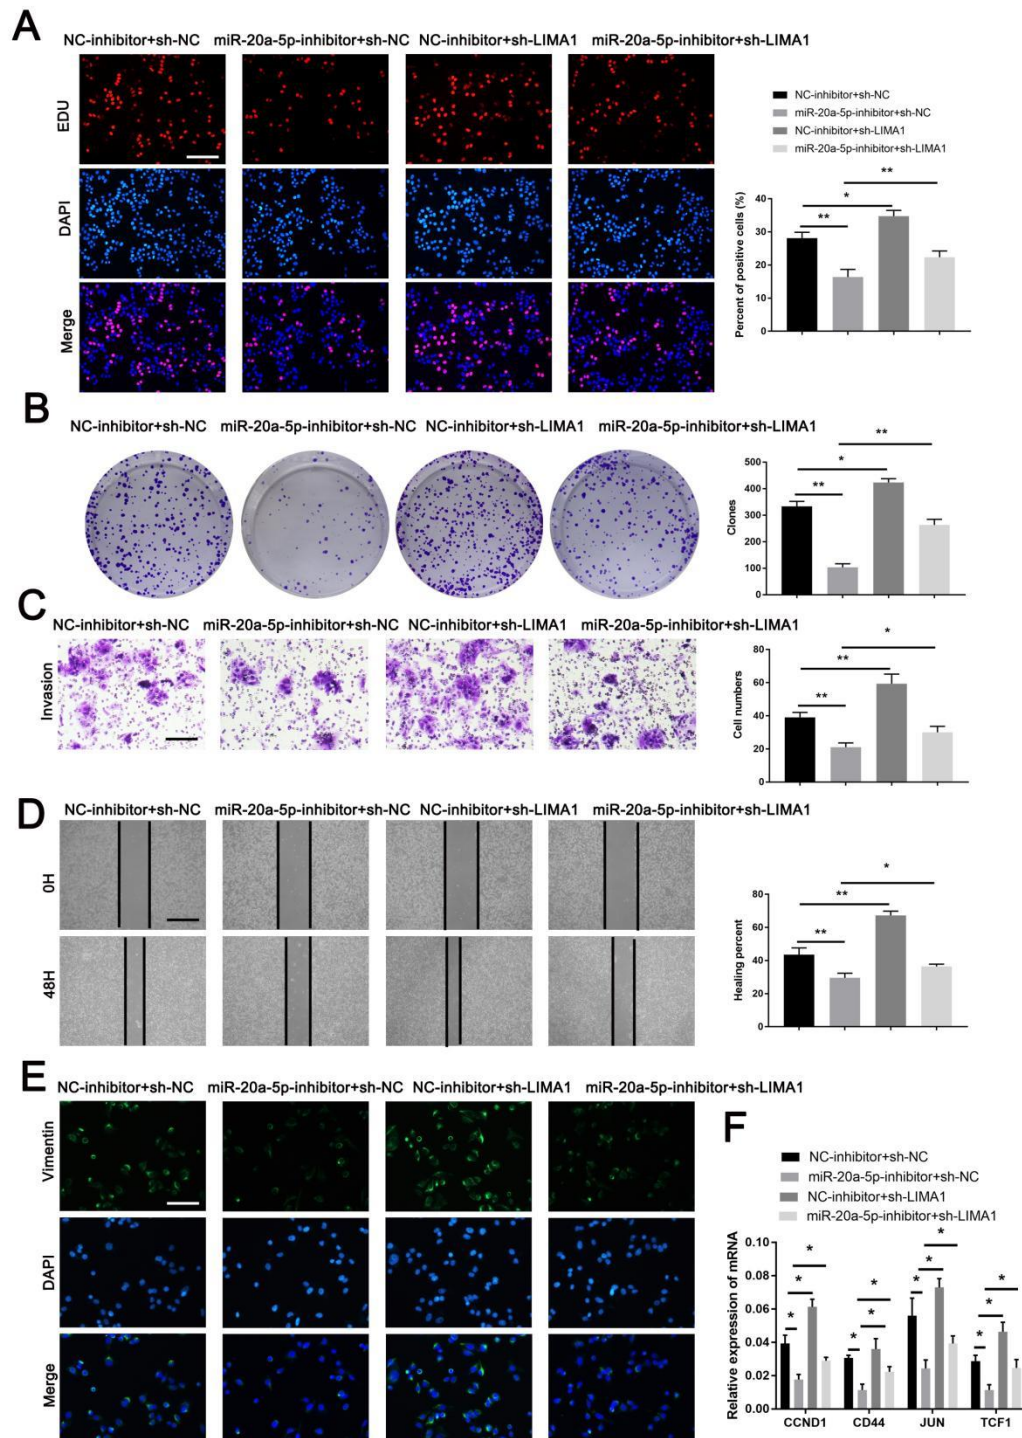

**Supplementary Figure S6.** LIMA1 knockdown restored the oncogenic role of miR-20a-5p. (A) Colony formation, (B) EdU, (C) Transwell, (D) wound healing assays and (E) immunofluorescence for vimentin were performed to detect the rescued effects of LIMA1 on miR-20a-5p in YY8103 cells cotransfected with NC-inhibitor+sh-NC,

miR-20a-5p-inhibitor+sh-NC, NC-inhibitor+sh-LIMA1 and miR-20a-5p-inhibitor+si-LIMA1.  
(F) The downstream molecules of  $\beta$ -catenin were examined by RT-qPCR in YY8103 cells cotransfected with NC-inhibitor+sh-NC, miR-20a-5p-inhibitor+sh-NC, NC-inhibitor+sh-LIMA1 and miR-20a-5p-inhibitor+sh-LIMA1 to determine the rescued effects of LIMA1 on miR-20a-5p.  $*P < 0.05$ ,  $**P < 0.01$ ,  $***P < 0.001$ .
